# Supplementary material
Source: PubMed Central journal article supplement (PMC5527637)
Supplement: AAC.00477-17_zac008176406s1.pdf [file AAC.00477-17_zac008176406s1.pdf]

**SUPPLEMENTARY TABLE 1.** Multiple reaction monitoring precursor ion and product ion transitions for liquid chromatography-mass spectrometry/mass spectrometry analysis of 11 targeted urinary metabolites. Deuterated internal standards were used for hippuric acid (hippuric acid-d5) and indoxyl sulfate (indoxyl sulfate-d4).

| <b>Metabolite</b>              | <b>Precursor</b> |            |                    |
|--------------------------------|------------------|------------|--------------------|
|                                | <b>MW</b>        | <b>Ion</b> | <b>Product Ion</b> |
| Name                           | (g/mol)          | (m/z)      | (m/z)              |
| Indole-3-propionic acid        | 189.2            | 188.2      | 116.2              |
| Indoxyl sulfate                | 251.3            | 212.2      | 132.2              |
| Phenylpropionylglycine         | 207.1            | 206.2      | 74.2               |
| Cinnamoylglycine               | 205.1            | 204.2      | 160.2              |
| Enterolactone                  | 298.3            | 297.4      | 253.3              |
| Enterodiol                     | 302.4            | 301.4      | 253.3              |
| 3,4 Dihydroxyphenylacetic acid | 168.2            | 167.1      | 123.2              |
| N-Acetyl-tryptophan            | 246.3            | 245.3      | 203.2              |
| Taurine                        | 125.1            | 124.1      | 80.1               |
| D-L Tyrosine                   | 181.2            | 180.2      | 119.2              |
| Hippuric acid                  | 179.2            | 178.2      | 134.2              |
| Hippuric acid-d <sub>5</sub>   | 184.2            | 183.1      | 139.2              |
| Indoxyl sulfate-d <sub>4</sub> | 217.2            | 216.2      | 136.2              |

m/z, mass/charge.
